# Supplementary material for: CX3CL1 Overexpression Prevents the Formation of Lung Metastases in Trastuzumab-Treated MDA-MB-453-Based Humanized Tumor Mice (HTM)
Source: MDPI journal article supplement (doi:10.3390/cancers13102459), 2021-05-18
Supplement: s1 [file s1]

# CX3CL1 Overexpression Prevents the Formation of Lung Metastases in Trastuzumab-Treated MDA-MB-453-Based Humanized Tumor Mice (HTM)

Anja K. Wege, Tobias F. Dreyer, Attila Teoman, Olaf Ortmann, Gero Brockhoff and Holger Bronger

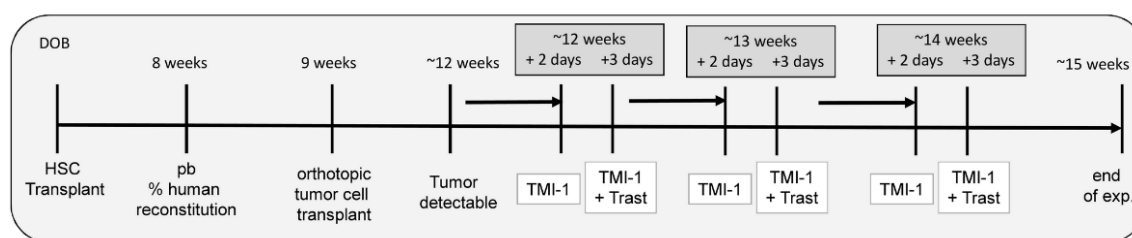

**Figure S1.** Timeline for mouse transplantation and treatments. Neonatal NSG mice were transplanted with CD34<sup>+</sup> hematopoietic stem cells. Eight weeks later humanized mice have been bled and analyzed for the presence of human immune cells (immune cell reconstitution). Mice that show more than 20% hCD45<sup>+</sup> cells in the peripheral blood were transplanted with MDA-MB-453 BC cells in the mammary fat pad. Two and three days after tumor detection (~12 weeks of age) TMI-1 treatment (100 mg/kg) started and were combined with trastuzumab (5 mg/kg) on day 3 post tumor detection. This strategy was repeated for 3 weeks and 1 week after the last treatment HTM were analyzed (~15 weeks of age). (DOB = day of birth; HSC = hematopoietic stem cells).

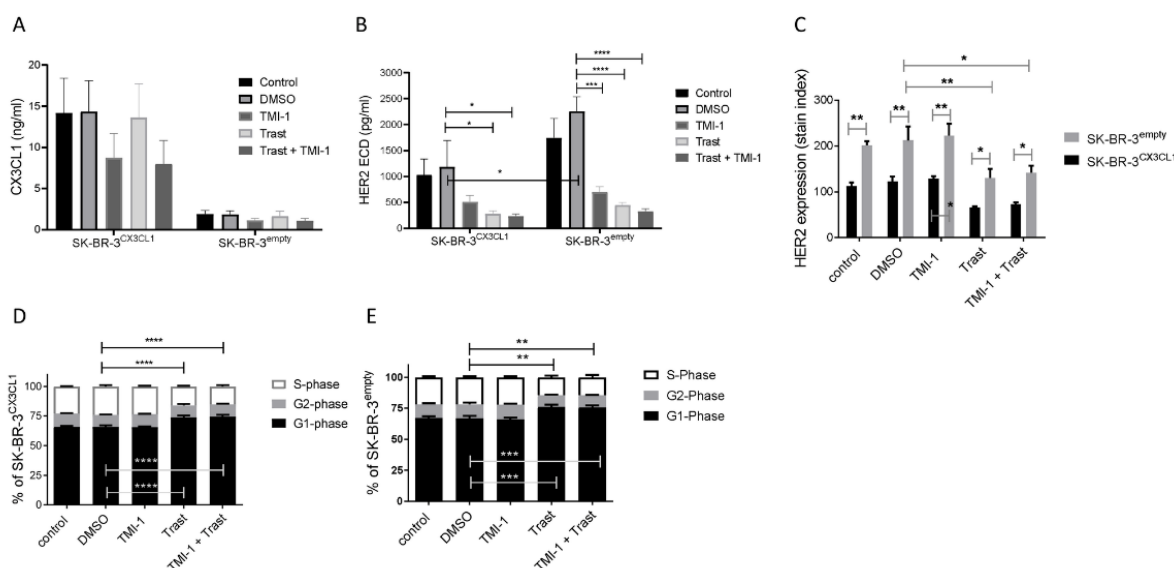

**Figure S2.** Treatment efficiency of trastuzumab and TMI-1 on SK-BR-3 tumor cells. SK-BR-3<sup>CX3CL1</sup> and SK-BR-3<sup>empty</sup> tumor cells were treated with DMSO, TMI-1, trastuzumab (Trast) or trastuzumab + TMI-1 for 48 h. Supernatants of the treated cell cultures were analyzed for CX3CL1 (A) or the extracellular domain of HER2 (HER2 ECD; B) in comparison to DMSO treated control cells. (C) HER2 expression intensity of the treated and untreated SK-BR-3 cells was analyzed by flow cytometry and stain index [MFI = mean fluorescence intensity; stain index = (MFI Her2–MFI Isotype)/(2 (x) SD Isotype)] was calculated. (D & E) Apoptosis induction was measured by flow cytometry using annexin and DAPI to allow the differentiation of live (Annexin<sup>-</sup> DAPI<sup>-</sup>), early apoptotic (Annexin<sup>+</sup> DAPI<sup>-</sup>), late apoptotic (Annexin<sup>+</sup> DAPI<sup>+</sup>), or very late apoptotic (Annexin<sup>+</sup> DAPI<sup>+</sup>) cells. All experiments were performed three times. Data are shown as mean ± SEM and Dunnett's multiple comparisons test (A, B, D, W) or Sidak's multiple comparisons test (C) was applied and significances indicated (\*  $p < 0.05$ ; \*\*  $p < 0.01$ ; \*\*\*  $p < 0.001$ ; \*\*\*\*  $p < 0.0001$ ).

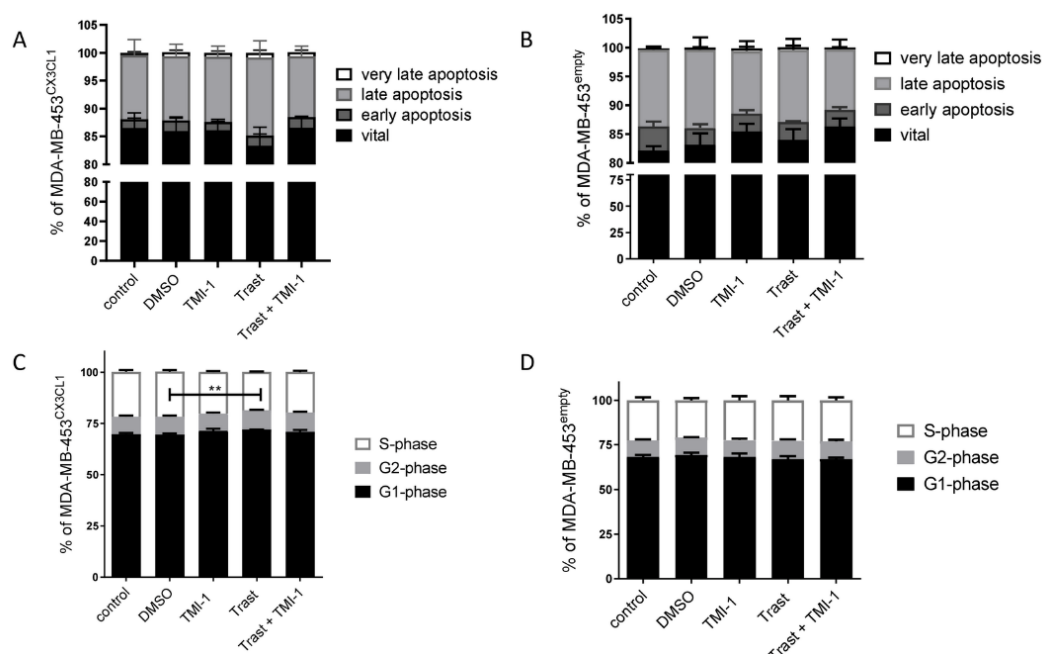

**Figure S3.** Efficiency of trastuzumab and TMI-1 treatment on MDA-MB-453 cells. MB453<sup>CX3CL1</sup> (A, C) and MDA-MB-453<sup>empty</sup> (B, D) tumor cells were treated with DMSO, TMI-1, trastuzumab (Trast) or trastuzumab + TMI-1 for 48 h. (A&B) Apoptosis induction was measured by flow cytometry using annexin and DAPI to allow the differentiation of live (Annexin<sup>-</sup> DAPI<sup>-</sup>), early apoptotic (Annexin<sup>+</sup> DAPI<sup>-</sup>), late apoptotic (Annexin<sup>+</sup> DAPI<sup>+</sup>), or very late apoptotic (Annexin<sup>-</sup> DAPI<sup>+</sup>) cells. (C&D) S-phase, G1, and G2 fraction were analyzed by flow cytometry. All experiments were performed three times. Data are shown as mean  $\pm$  SEM and Tukey's multiple comparisons test was applied and significances indicated (\*  $p < 0.05$ ; \*\*  $p < 0.01$ ).

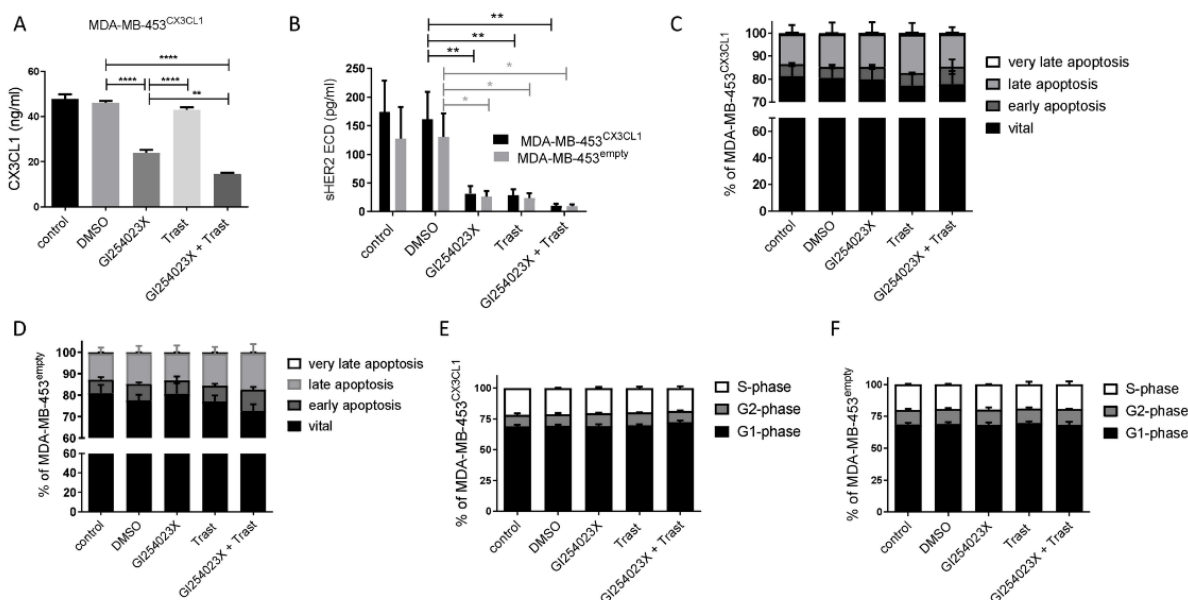

**Figure S4.** Treatment efficiency of trastuzumab and GI254023X in-vitro. MDA-MB-453<sup>CX3CL1</sup> and MDA-MB-453<sup>empty</sup> tumor cells were treated with DMSO, GI254023X, trastuzumab (Trast) or trastuzumab + GI254023X for 48 h. Supernatants of the treated cell cultures were analyzed for CX3CL1 (A) or the extracellular domain of HER2 (HER2 ECD) in comparison to DMSO treated control cells. (C&D) Apoptosis induction was measured by flow cytometry using annexin and DAPI to allow the differentiation of live (Annexin<sup>-</sup> DAPI<sup>-</sup>), early apoptotic (Annexin<sup>+</sup> DAPI<sup>-</sup>), late apoptotic (Annexin<sup>+</sup> DAPI<sup>+</sup>), or

very late apoptotic (Annexin<sup>+</sup> DAPI<sup>+</sup>) cells. (E&F) S-phase, G1, and G2 fraction were analyzed by flow cytometry. All experiments were performed three times. Data are shown as mean  $\pm$  SEM and Tukey's multiple comparisons test was applied and significances indicated (\*  $p < 0.05$ ; \*\*  $p < 0.01$ ; \*\*\*  $p < 0.0001$ ).

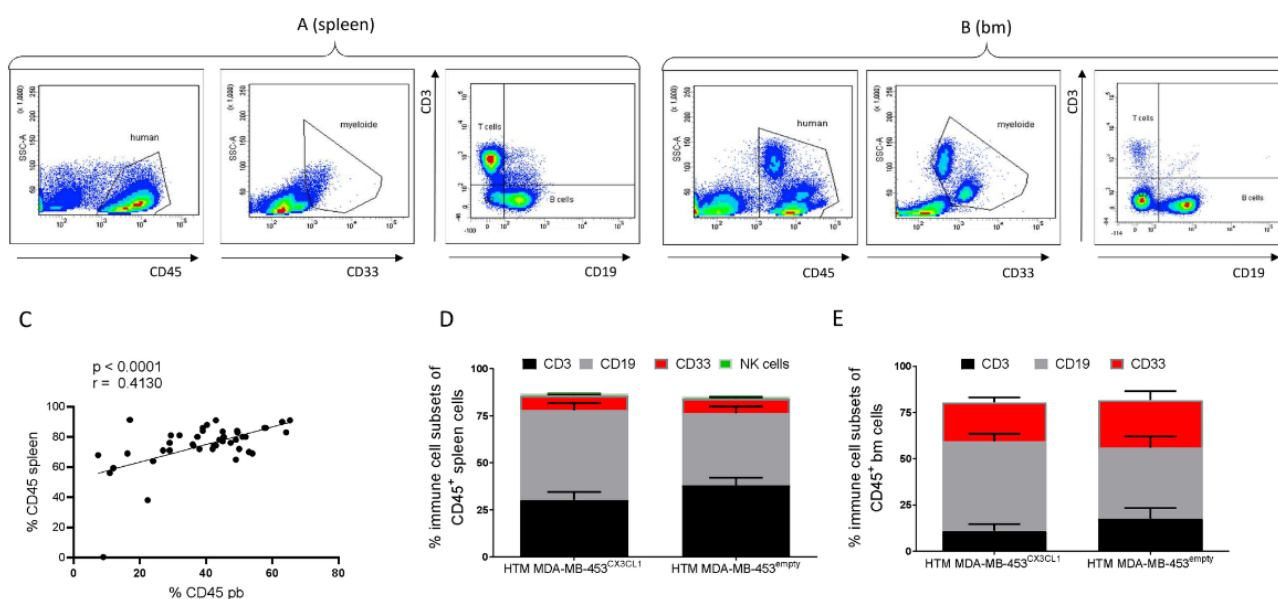

**Figure S5.** Human immune cell reconstitution in MDA-MB-453 and MDA-MB-453 transplanted HTM. Immune cell gating strategies for the spleen (A) and the bone marrow (BM; B) are displayed. (C) The correlation of the reconstitution levels (% CD45 cells) taken at the age of 8 weeks from the peripheral blood (pb) and from the spleen at the end of the experiments were calculated (Pearson's correlation coefficient  $r = 0.4130$ ). The overall human reconstitution (% human immune cells; CD45) in all analyzed MDA-MB-453 and MDA-MB-453 transplanted HTM in the spleen (D) and bone marrow (bm; E) were analyzed by flow cytometry.

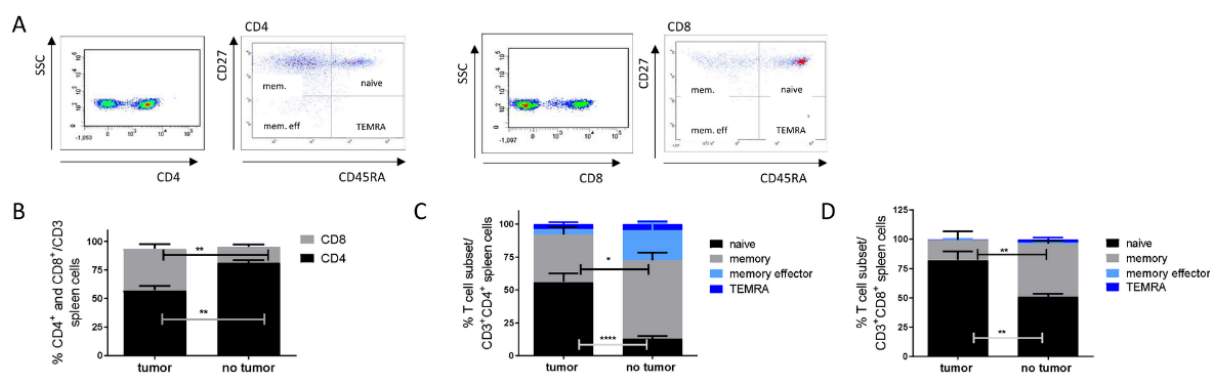

**Figure S6.** CD4<sup>+</sup> and CD8<sup>+</sup> T cell maturation in HTM transplanted with a reduced number of MDA-MB-453<sup>CX3CL1</sup> and MDA-MB-453<sup>empty</sup> cells. Humanized NSG mice were transplanted with only 50,000 MDA-MB-453<sup>CX3CL1</sup> and MDA-MB-453<sup>empty</sup> cells, and HTM with tumors were compared to HTM without tumor development. (A) Gating strategy for the detection of CD4<sup>+</sup> and CD8<sup>+</sup> subsets (naïve, memory (mem), memory effector (mem. Eff.), and terminally differentiated effector memory (TEMRA). HTM with tumors were compared to HTM without tumor development showing differences in the CD4<sup>+</sup>/CD8<sup>+</sup> proportion (B) and the T cell sub populations of CD4<sup>+</sup> (C) and CD8<sup>+</sup> (D) T cells isolated from the spleen. Significances were calculated using Sidak's multiple comparisons test (\*  $p < 0.05$ ; \*\*  $p < 0.01$ ; \*\*\*  $p < 0.0001$ ).

**Table S1.** Overview of tumor load and metastasized tumor cells in the lung and bone marrow of individual MDA-MB-453<sup>CX3CL1</sup> and MDA-MB-453<sup>empty</sup> transplanted HTM. Tumor load of each MB453<sup>CX3CL1</sup> and MDA-MB-453<sup>empty</sup> transplanted HTM was calculated ( $\text{Volume (mm}^3\text{)} = (l \times w^2)/2$ ) at the end of the experiment and single cells isolated from lung and bone marrow were analyzed by flow cytometry to define % of HER2+ tumor cells. DTC = disseminated tumor cells in the bone marrow; n.d.= no data, \*early termination of the experiment due to animal welfare reasons. \*\* mouse died.

| MDA-MB-453 <sup>CX3CL1</sup> |              |                                 |                                          |                              |
|------------------------------|--------------|---------------------------------|------------------------------------------|------------------------------|
| Mouse #                      | Treatment    | Tumor Volume (mm <sup>3</sup> ) | Lung Metastases<br>(% HER2+ Tumor Cells) | DTC<br>(% HER2+ Tumor Cells) |
| HUM 7                        | control      | 269,5                           | 0.1                                      | 0.1                          |
| HUM 22                       | control      | 567                             | 0.2                                      | 0.4                          |
| HUM 32                       | control      | 162*                            | 0.1                                      | 0.4                          |
| HUM 53                       | control      | 320                             | 0.6                                      | 0.3                          |
| HUM 36                       | control      | 245                             | 0.5                                      | 0.1                          |
| HUM 48                       | control      | 180                             | 0.2                                      | 0.5                          |
| HUM 15                       | TMI-1        | 137.5                           | 0                                        | 0.2                          |
| HUM 17                       | TMI-1        | 198                             | 3.9                                      | 0.1                          |
| HUM 35                       | TMI-1        | 416                             | 0.8                                      | 0.1                          |
| HUM 38                       | TMI-1        | 1224                            | 0.2                                      | 0.5                          |
| HUM 25                       | TMI-1        | 61                              | 0                                        | 0.1                          |
| HUM 9                        | Trast        | 18                              | 0                                        | 0                            |
| HUM 16                       | Trast        | 0                               | 0                                        | 0                            |
| HUM 23                       | Trast        | 8                               | 0.2                                      | 0.2                          |
| HUM 31                       | Trast        | 112.5*                          | 0                                        | 0.9                          |
| HUM 37                       | Trast        | 1                               | 0                                        | 0.3                          |
| HUM 44                       | Trast        | 40                              | 0                                        | 0.2                          |
| HUM 52                       | Trast        | 0                               | 0                                        | 0.2                          |
| HUM 14                       | TMI-1 +Trast | 27                              | 0.1                                      | 0                            |
| HUM 18                       | TMI-1 +Trast | 16                              | 0                                        | 0                            |
| HUM 20                       | TMI-1 +Trast | 0                               | 0                                        | 0.1                          |
| HUM 33                       | TMI-1 +Trast | 0                               | 0                                        | 0.1                          |
| HUM 39                       | TMI-1 +Trast | 1                               | 0                                        | 0.3                          |
| MDA-MB-453 <sup>empty</sup>  |              |                                 |                                          |                              |
| Mouse #                      | Treatment    | Tumor Volume (mm <sup>3</sup> ) | Lung Metastases<br>(% HER2+ Tumor Cells) | DTC<br>(% HER2+ Tumor Cells) |
| HUM 10                       | control      | 144                             | 0.1                                      | 0.4                          |
| HUM 19*                      | control      | 112.5                           | 0.2                                      | 0                            |
| HUM 30                       | control      | 270                             | 0.3                                      | 0.5                          |
| HUM 45                       | control      | 196                             | 0.5                                      | 0.1                          |
| HUM 47                       | control      | 320                             | 0.2                                      | 0.1                          |
| HUM 51                       | control      | 608                             | 0.1                                      | 0.3                          |
| HUM 13                       | TMI-1        | 623                             | 0.1                                      | 0.5                          |
| HUM 27                       | TMI-1        | 48                              | 0.7                                      | 0                            |
| HUM 28                       | TMI-1        | 269.5                           | 0.3                                      | n.d.                         |
| HUM 41                       | TMI-1        | 180                             | 0.2                                      | 0.4                          |
| HUM 20-27                    | TMI-1        | 56                              | 0                                        |                              |
| HUM 25                       | Trast        | 0                               | 0.1                                      | n.d.                         |
| HUM 34                       | Trast        | 0                               | 0                                        | 0.4                          |
| HUM 29                       | Trast        | 0,5                             | 0                                        | 0.9                          |
| HUM 43                       | Trast        | 18                              | 0                                        | 0.4                          |
| HUM 40                       | Trast        | 40                              | 0.1                                      | 0.4                          |
| HUM 8                        | Trast        | 62.5                            | n.d.                                     | 0.6                          |
| HUM 49                       | Trast        | 0                               | 0.4                                      | 0.3                          |
| HUM 24                       | TMI-1 +Trast | 6                               | 0.2                                      | n.d.                         |
| HUM 26                       | TMI-1 +Trast | 13.5                            | 0                                        | 0                            |
| HUM 42                       | TMI-1 +Trast | 13.5                            | 0                                        | 0.2                          |
| HUM 11                       | TMI-1 +Trast | 18                              | **                                       | **                           |
| HUM 31                       | TMI-1 +Trast | 0                               | 0                                        | 0                            |

---

DTC = disseminated tumor cells in the bone marrow,\*early termination of the experiment due to animal welfare reasons. DTC = disseminated tumor cells in the bone marrow; n.d.= no data,\*early termination of the experiment due to animal welfare reasons. \*\*mouse died.
